# Supplementary material for: Inferring Latent States and Refining Force Estimates via Hierarchical Dirichlet Process Modeling in Single Particle Tracking Experiments
Source: PubMed Central journal article supplement (PMC4575198; doi:10.1371/journal.pone.0137633), 2015-09-18
Supplement: pone.0137633.s003.pdf [file pone.0137633.s003.pdf]

### S3 Text: Connecting Linear Continuous Time SDE Model Parameters to Those of Discrete SLDS Models

The continuous time analog of Eqn. 1 is given by the following stochastic differential equation (SDE):

$$d\vec{r}_t = \Phi \vec{F}(\vec{r}_t) dt + \sqrt{2}\sigma dB_t. \quad (5)$$

In the equation above,  $\vec{F}(\vec{r})$  represents the effective force experienced by a molecule located at position  $R$ ,  $\Phi$  models the friction matrix, and  $\sigma$  is related to the diffusion coefficient [1]. This overdamped Langevin framework is fairly general, e.g. non-linear and/or time dependent forces can fit to data using this type of model [1–4]. Note that in the HDP-SLDS, we use  $F$  to denote a fixed matrix, whereas in the overdamped Langevin equation above,  $\vec{F}(\vec{r})$  is a vector depending on the instantaneous molecular position. In the specific linear parametric models considered in this article, each SDE contributing to an SLDS state (or “mode”) is parameterized by a finite dimensional vector denoted by  $\theta$ . The parameters contained in  $\theta$  and the remaining terms in Eqn. 5 are defined by the following equations:

$$\vec{F}(\vec{r}) = \vec{A} + B\vec{r} \quad (6)$$

$$\sigma = C \quad (7)$$

$$\Phi = \sigma\sigma^T / k_B T. \quad (8)$$

In the expressions above,  $k_B T$  represents Boltzmann’s constant multiplied by the system temperature. The net collection of parameters to be estimated is  $\theta \equiv (\vec{A}, B, C, R)$ ; a separate  $\theta$  is estimated for each unique SLDS state. In the models considered throughout this article,  $\vec{A}$  is a 2D vector (i.e.,  $\vec{A} \in \mathbb{R}^2$ ).  $B$ ,  $C$ , and  $R$  are  $2 \times 2$  real matrices. The local diffusion coefficient,  $D$ , is defined by  $D \equiv C \times C^T$ . Physical interpretations of the other continuous time parameters are presented in Sec. 1.1.1 of the main manuscript and Ref. [1].

Here we focus on how to map parameters estimated by the HDP-SLDS inference to the continuous time SDE parameters (e.g., this is useful for when wants to compute overdamped Langevin type parameters from the HDP-SLDS output). To simply notation, we will work with the following auxiliary quantities:  $\mathcal{Q} \equiv 2C \times C^T$ ,  $\vec{A}' \equiv \frac{1}{2k_B T} \mathcal{Q}\vec{A}$ ,  $B' \equiv \frac{1}{2k_B T} \mathcal{Q}B$ ; the first auxiliary variable is the instantaneous covariance associated with the continuous time model; the next two auxiliary variables expresses the drift terms of a linear velocity field.

With the auxiliary variables defined above, we show how to transform some of the output of the discrete HDP-SLDS inference algorithm computed using observations evenly spaced  $\Delta t$  time units apart ( $\vec{\mu}, F, \Sigma$ ) into the corresponding SDE parameters ( $\vec{A}', B', \mathcal{Q}$ ). No transformation is required for  $R$  since

observations are discrete in both models. The easiest quantity to extract is  $B' = \frac{1}{\Delta t} \log_m(F)$  where  $\log_m(\cdot)$  is the principal matrix logarithm (i.e., the inverse of matrix exponential). Given  $B'$  and the rest of the HDP-SLDS output, one can readily compute  $\vec{A}' = (- (Id - F) \times (B')^{-1})^{-1} \vec{\mu}$  where  $Id$  denotes the identity matrix; this relation is another simple consequence of the known solution to the linear SDE [5]. Typically, one is given continuous time parameters  $\Delta t$ ,  $\mathcal{Q}$  and  $B'$  and computes the corresponding quantities defining a discrete observation scenario. That is, one quickly computes  $F = \exp(\Delta t B')$  and uses this to setup the following matrix equation:

$$B'\Sigma + \Sigma(B')^T = F\mathcal{Q}F^T - \mathcal{Q}. \quad (9)$$

One can then solve for  $\Sigma$  using standard control theory tools [6, 7]. However,  $\mathcal{Q}$  and hence  $C = (\frac{1}{2}\mathcal{Q})^{1/2}$  can be readily solved for explicitly given  $(F, \Sigma, B')$  since the expression above is linear in  $\mathcal{Q}$ . Recall  $F$  and  $\Sigma$  are provided directly by the HDP-SLDS inference and  $B'$  can be computed using the procedure described above. Symbolic packages such as Mathematica can be exploited to reliably obtain expressions for  $\mathcal{Q}$ .

## References

1. Calderon CP, Thompson MA, Casolari JM, Paffenroth RC, Moerner WE (2013) Quantifying Transient 3D Dynamical Phenomena of Single mRNA Particles in Live Yeast Cell Measurements. *J Phys Chem B* 117: 15701–13.
2. Calderon CP, Harris N, Kiang C, Cox D (2009) Quantifying multiscale noise sources in single-molecule time series. *J Phys Chem B* 113: 138.
3. Calderon CP (2007) On the use of local diffusion models for path ensemble averaging in potential of mean force computations. *J Chem Phys* 126: 084106.
4. Calderon CP, Martinez J, Carroll R, Sorensen D (2010) P-splines using derivative information. *Multiscale Model Simul* 8: 1562–1580.
5. Kloeden P, Platen E (1992) *Numerical Solution of Stochastic Differential Equations*. Berlin: Springer-Verlag.
6. Stengel R (1994) *Optimal Control and Estimation*. Toronto, Ontario: Dover Publications.
7. Gardiner JD, Wette MR, Laub AJ, Amato JJ, Moler CB (1992) Algorithm 705; a FORTRAN-77 software package for solving the sylvester matrix equation  $AXBT + CXDT = E$ . *ACM Trans Math Softw* : 232-238.
