# Supplementary material for: Inferring Latent States and Refining Force Estimates via Hierarchical Dirichlet Process Modeling in Single Particle Tracking Experiments
Source: PubMed Central journal article supplement (PMC4575198; doi:10.1371/journal.pone.0137633), 2015-09-18

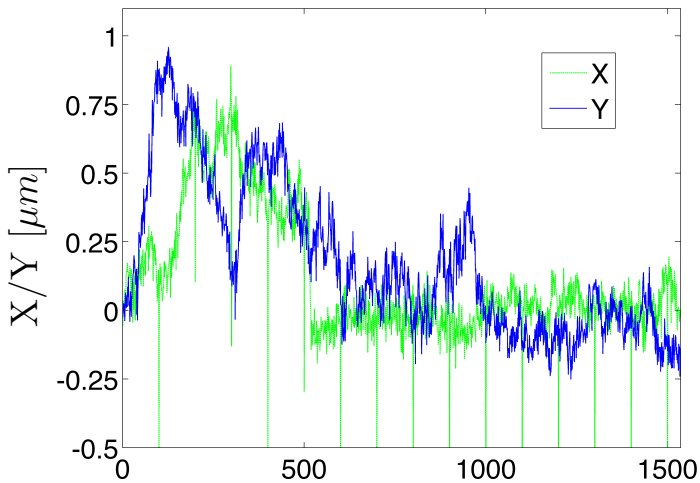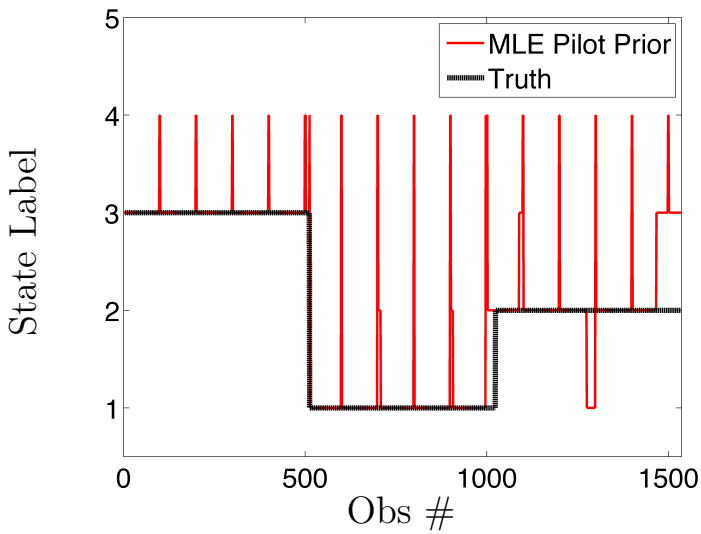

Supplement: pone.0137633.s013.pdf [file pone.0137633.s013.pdf]
